# Supplementary material for: A regulatory variant at 3q21.1 confers an increased pleiotropic risk for hyperglycemia and altered bone mineral density
Source: PubMed Central journal article supplement (PMC7928941; doi:10.1016/j.cmet.2021.01.001), 2021-03-02
Supplement: mmc1.pdf [file mmc1.pdf]

**Supplemental information**

**A regulatory variant at *3q21.1* confers  
an increased pleiotropic risk for hyperglycemia  
and altered bone mineral density**

**Nasa Sinnott-Armstrong, Isabel S. Sousa, Samantha Laber, Elizabeth Rendina-Ruedy, Simon E. Nitter Dankel, Teresa Ferreira, Gunnar Mellgren, David Karasik, Manuel Rivas, Jonathan Pritchard, Anyonya R. Guntur, Roger D. Cox, Cecilia M. Lindgren, Hans Hauner, Richard Sallari, Clifford J. Rosen, Yi-Hsiang Hsu, Eric S. Lander, Douglas P. Kiel, and Melina Claussnitzer**

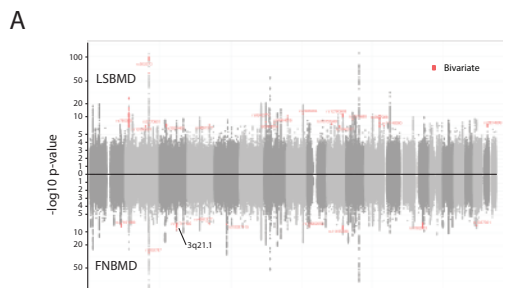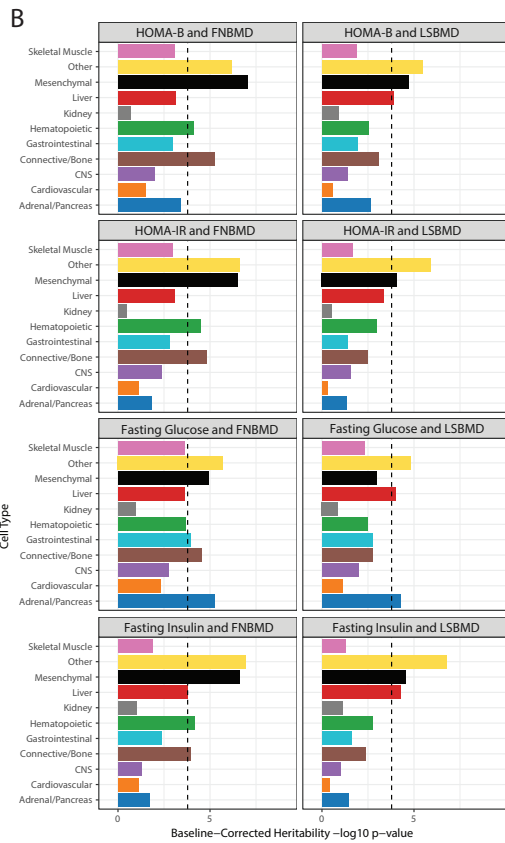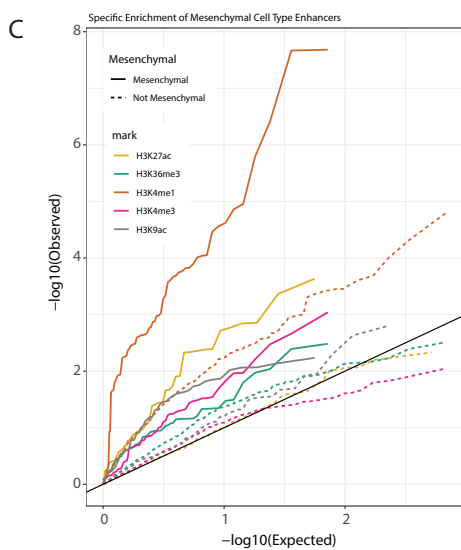

**D**

Emission Parameters

|             | H3K36me3 | H3K36me3 | H3K4me1 | H3K79me2 | H3K4me1 | H3K27ac | DNAse | H3K9ac | H3K4me3 | H3K4me3 | DNase | DNase | H3K4me3 | H3K27me3 |
|-------------|----------|----------|---------|----------|---------|---------|-------|--------|---------|---------|-------|-------|---------|----------|
| 1_TopA      | 0.4      | 0.1      | 0.0     | 5.0      | 0.4     | 89.3    | 92.3  | 96.5   | 99.9    | 99.1    | 86.4  | 3.5   |         |          |
| 2_PromD1    | 0.6      | 0.0      | 0.5     | 6.2      | 99.3    | 91.5    | 82.4  | 96.1   | 99.6    | 100.0   | 95.6  | 23.4  |         |          |
| 3_PromD1    | 0.2      | 1.7      | 7.0     | 98.4     | 60.8    | 99.8    | 92.2  | 100.0  | 100.0   | 100.0   | 93.2  | 6.3   |         |          |
| 4_PromD2    | 0.9      | 7.3      | 20.3    | 94.2     | 87.5    | 52.3    | 8.0   | 55.1   | 86.7    | 98.0    | 7.2   | 5.2   |         |          |
| 5_TopS      | 0.4      | 1.1      | 17.0    | 76.2     | 0.3     | 0.2     | 0.7   | 0.0    | 0.0     | 0.1     | 0.0   | 0.1   |         |          |
| 6_Top       | 0.7      | 94.2     | 45.7    | 80.9     | 7.2     | 1.0     | 1.0   | 0.0    | 0.0     | 0.4     | 0.0   | 0.1   |         |          |
| 7_Top3      | 0.1      | 85.8     | 1.3     | 0.8      | 0.1     | 0.0     | 0.5   | 0.0    | 0.0     | 0.0     | 0.0   | 0.0   |         |          |
| 8_TopW      | 0.0      | 2.4      | 0.1     | 1.3      | 0.1     | 0.0     | 0.5   | 0.0    | 0.0     | 0.0     | 0.0   | 0.0   |         |          |
| 9_TopReg    | 0.2      | 27.5     | 60.2    | 98.1     | 98.3    | 99.9    | 72.1  | 92.8   | 74.0    | 99.6    | 6.1   | 1.3   |         |          |
| 10_TopEnh3  | 0.2      | 25.9     | 49.5    | 96.2     | 94.1    | 94.6    | 25.7  | 5.8    | 2.0     | 41.6    | 0.5   | 0.2   |         |          |
| 11_TopEnh3  | 0.4      | 89.6     | 14.8    | 11.0     | 74.3    | 50.0    | 20.3  | 2.9    | 1.4     | 11.8    | 0.5   | 0.5   |         |          |
| 12_TopEnhW  | 0.1      | 9.3      | 48.3    | 95.5     | 76.8    | 3.2     | 6.6   | 0.0    | 0.4     | 18.9    | 0.1   | 0.8   |         |          |
| 13_EnhA1    | 0.2      | 4.0      | 1.3     | 5.9      | 99.3    | 99.9    | 83.7  | 95.7   | 38.3    | 95.7    | 43.3  | 0.4   |         |          |
| 14_EnhA2    | 0.2      | 0.5      | 0.8     | 2.6      | 97.4    | 97.2    | 59.1  | 7.5    | 9.6     | 96.8    | 29.0  | 0.6   |         |          |
| 15_EnhAF    | 0.3      | 0.4      | 0.5     | 2.1      | 97.7    | 94.5    | 31.0  | 3.7    | 1.2     | 2.3     | 6.3   | 0.7   |         |          |
| 16_EnhW1    | 0.1      | 0.0      | 0.2     | 0.5      | 91.2    | 16.8    | 39.1  | 3.4    | 15.2    | 73.3    | 46.4  | 0.9   |         |          |
| 17_EnhW2    | 0.1      | 0.2      | 0.5     | 1.0      | 75.9    | 0.4     | 13.8  | 0.0    | 0.0     | 1.3     | 0.9   | 0.5   |         |          |
| 18_EnhAc    | 0.3      | 0.3      | 0.1     | 1.1      | 4.9     | 64.3    | 19.4  | 0.7    | 0.5     | 3.3     | 1.2   | 0.4   |         |          |
| 19_DNase    | 0.1      | 0.0      | 0.1     | 0.6      | 3.4     | 0.3     | 44.7  | 0.0    | 0.0     | 1.4     | 6.2   | 0.1   |         |          |
| 20_ZNF/Rpts | 88.9     | 82.0     | 1.0     | 15.9     | 0.5     | 0.1     | 0.6   | 0.2    | 4.7     | 1.4     | 0.0   | 0.1   |         |          |
| 21_Het      | 69.6     | 0.2      | 0.0     | 0.1      | 0.0     | 1.4     | 0.0   | 0.2    | 0.1     | 0.0     | 0.5   | 0.0   |         |          |
| 22_PromP    | 2.6      | 0.3      | 0.2     | 2.0      | 9.6     | 11.0    | 19.6  | 9.1    | 34.5    | 67.6    | 18.0  | 1.0   |         |          |
| 23_PromBiv  | 2.2      | 0.3      | 2.4     | 4.0      | 76.6    | 15.6    | 29.5  | 23.9   | 63.9    | 83.1    | 44.4  | 96.6  |         |          |
| 24_ReprPC   | 1.1      | 0.1      | 0.3     | 0.3      | 3.4     | 0.2     | 1.2   | 0.0    | 0.1     | 0.3     | 0.1   | 72.4  |         |          |
| 25_Quies    | 0.1      | 0.0      | 0.0     | 0.0      | 0.0     | 0.0     | 0.0   | 0.0    | 0.0     | 0.0     | 0.0   | 0.1   |         |          |

Median Enrichments

|             | Genome % | CpG hg19 | Evans.Gencode.v0.hg19 | Genes.Gencode.v0.hg19 | Intons.Gencode.v0.hg19 | ES.Gencode.v0.hg19 | ES_2kb.Gencode.v0.hg19 | SS.Gencode.v0.hg19 | SS_2kb.Gencode.v0.hg19 | ZNF_genes |
|-------------|----------|----------|-----------------------|-----------------------|------------------------|--------------------|------------------------|--------------------|------------------------|-----------|
| 1_TopA      | 0.88     | 97.56    | 10.08                 | 1.12                  | 0.64                   | 3.50               | 2.55                   | 96.91              | 9.44                   | 3.58      |
| 2_PromD1    | 0.41     | 36.50    | 4.75                  | 1.12                  | 0.84                   | 2.94               | 2.37                   | 16.12              | 7.18                   | 1.86      |
| 3_PromD1    | 0.41     | 55.24    | 8.53                  | 1.82                  | 1.30                   | 3.55               | 2.74                   | 36.57              | 9.70                   | 4.26      |
| 4_PromD2    | 0.19     | 2.32     | 3.44                  | 1.91                  | 1.80                   | 3.16               | 2.51                   | 2.52               | 7.98                   | 4.65      |
| 5_TopS      | 2.22     | 0.13     | 0.56                  | 1.97                  | 2.08                   | 0.72               | 0.94                   | 0.59               | 1.22                   | 2.44      |
| 6_Top       | 0.70     | 1.34     | 5.15                  | 1.96                  | 1.72                   | 5.95               | 3.83                   | 2.52               | 2.84                   | 3.25      |
| 7_Top3      | 3.48     | 0.95     | 5.57                  | 1.93                  | 1.65                   | 5.93               | 4.34                   | 1.99               | 2.58                   | 2.76      |
| 8_TopW      | 5.88     | 0.34     | 1.87                  | 1.85                  | 1.86                   | 1.70               | 2.15                   | 0.84               | 1.55                   | 2.40      |
| 9_TopReg    | 0.30     | 2.76     | 4.01                  | 1.93                  | 1.77                   | 4.20               | 2.60                   | 3.85               | 5.05                   | 1.45      |
| 10_TopEnh3  | 0.38     | 0.36     | 1.81                  | 1.96                  | 1.97                   | 2.00               | 1.54                   | 1.48               | 1.96                   | 1.41      |
| 11_TopEnh3  | 0.21     | 1.22     | 7.20                  | 1.89                  | 1.47                   | 7.26               | 4.79                   | 2.65               | 3.04                   | 1.35      |
| 12_TopEnhW  | 0.51     | 0.28     | 1.15                  | 1.96                  | 2.03                   | 1.18               | 1.18                   | 1.05               | 2.27                   | 2.09      |
| 13_EnhA1    | 0.22     | 0.93     | 2.16                  | 1.26                  | 1.18                   | 1.89               | 1.77                   | 2.76               | 2.50                   | 0.79      |
| 14_EnhA2    | 0.34     | 0.37     | 1.45                  | 1.22                  | 1.20                   | 1.29               | 1.33                   | 1.84               | 1.95                   | 0.83      |
| 15_EnhAF    | 0.48     | 0.16     | 1.31                  | 1.23                  | 1.25                   | 1.17               | 1.31                   | 1.06               | 1.59                   | 0.69      |
| 16_EnhW1    | 0.28     | 1.78     | 1.70                  | 0.99                  | 0.94                   | 1.58               | 1.39                   | 2.99               | 2.98                   | 1.01      |
| 17_EnhW2    | 0.95     | 0.25     | 1.23                  | 1.24                  | 1.25                   | 1.17               | 1.24                   | 1.02               | 1.48                   | 0.79      |
| 18_EnhAc    | 0.27     | 0.24     | 1.14                  | 1.21                  | 1.22                   | 1.05               | 1.23                   | 1.33               | 1.57                   | 0.66      |
| 19_DNase    | 0.63     | 0.43     | 0.92                  | 0.94                  | 0.95                   | 1.04               | 0.96                   | 1.70               | 1.16                   | 0.52      |
| 20_ZNF/Rpts | 0.18     | 0.68     | 5.02                  | 1.86                  | 1.61                   | 4.02               | 3.30                   | 1.03               | 1.50                   | 71.79     |
| 21_Het      | 0.91     | 0.91     | 1.02                  | 0.71                  | 0.69                   | 0.86               | 0.83                   | 0.55               | 0.76                   | 7.69      |
| 22_PromP    | 0.20     | 14.16    | 3.01                  | 1.22                  | 1.09                   | 2.22               | 1.79                   | 10.48              | 5.02                   | 1.51      |
| 23_PromBiv  | 0.25     | 53.53    | 5.88                  | 1.31                  | 0.95                   | 3.71               | 2.62                   | 12.96              | 6.81                   | 0.72      |
| 24_ReprPC   | 1.32     | 4.88     | 2.02                  | 0.99                  | 0.92                   | 1.74               | 1.69                   | 1.69               | 2.75                   | 0.47      |
| 25_Quies    | 78.38    | 0.14     | 0.53                  | 0.83                  | 0.85                   | 0.58               | 0.67                   | 0.38               | 0.64                   | 0.50      |

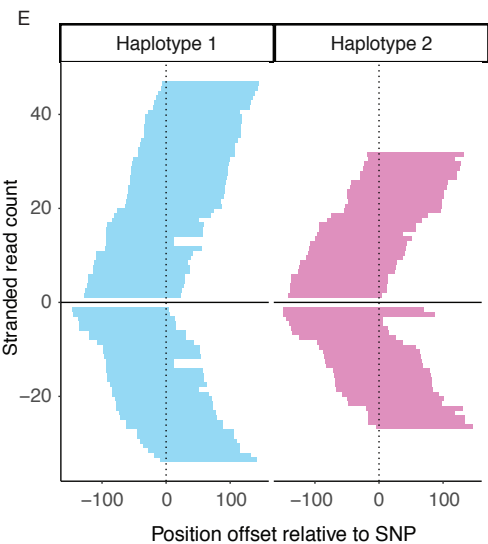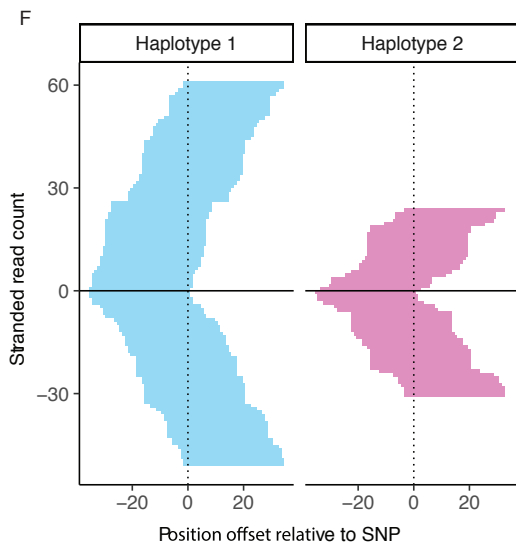

Supplementary Figure 1

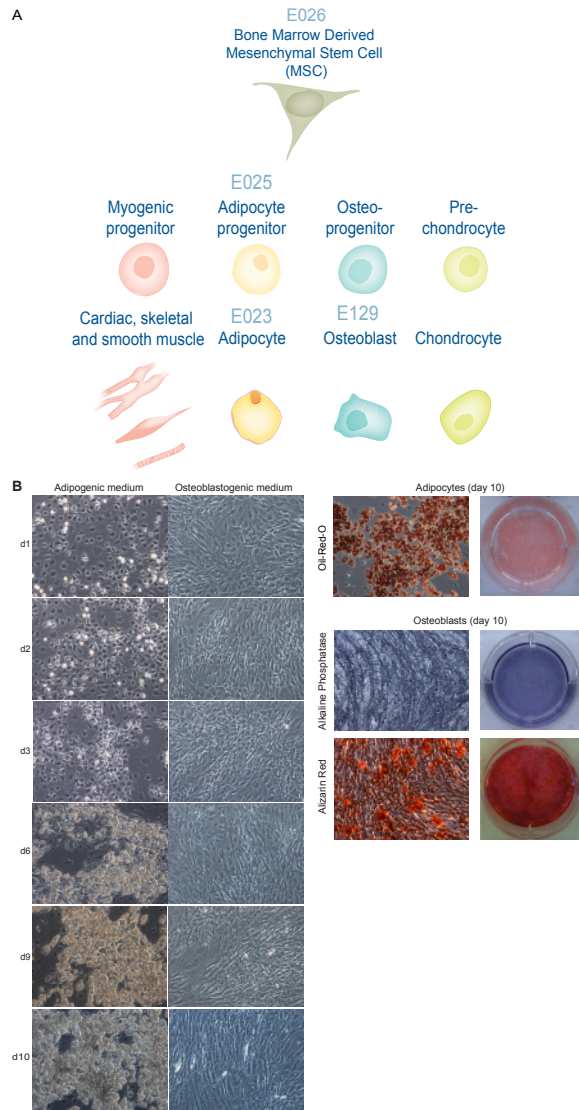

Supplementary Figure 2

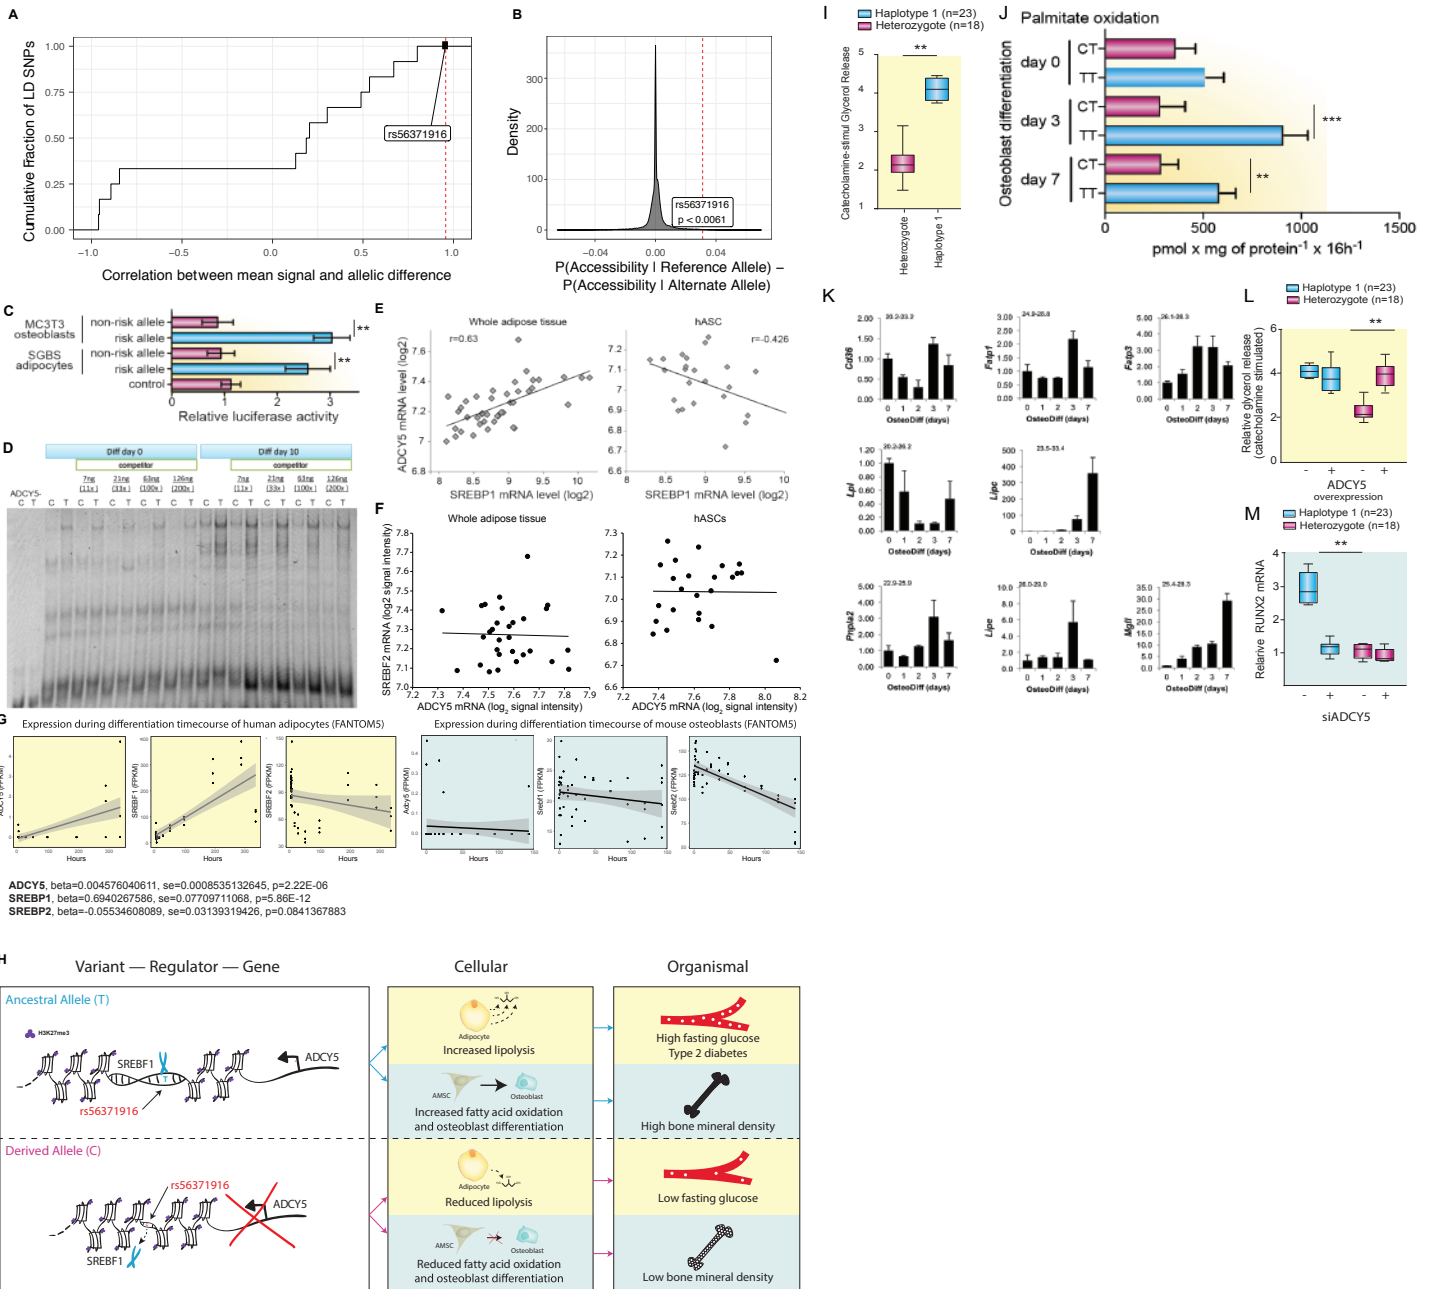

Supplementary Figure 3

Table S2. Related to Figure 2. Allelic bias through differentiation in ATAC-seq, H3K27me3 and H3K27ac ChIP-seq read counts.

| Assay             | Timepoint | Haplotype 1 Reads | Haplotype 1 Reads | Haplotype 2 Reads | Haplotype 2 Reads | Allelic Ratio | P-value |
|-------------------|-----------|-------------------|-------------------|-------------------|-------------------|---------------|---------|
| ATAC-seq          | Day 0     | 25                | 18                | 9                 | 14                | 1.87          | 0.02    |
| ATAC-seq          | Day 2     | 26                | 18                | 10                | 14                | 1.83          | 0.021   |
| ATAC-seq          | Day 14    | 12                | 25                | 4                 | 15                | 1.95          | 0.02    |
| H3K27me3 ChIP-seq | Day 0     | 76                | 60                | 82                | 52                | 1.01          | 0.95    |
| H3K27me3 ChIP-seq | Day 2     | 87                | 59                | 53                | 68                | 1.21          | 0.46    |
| H3K27me3 ChIP-seq | Day 14    | 73                | 73                | 56                | 84                | 1.04          | 0.31    |

Table S3. Related to Figure 2. Relative mRNA levels in AMSCs differentiated to osteoblasts (n=5) and adipocytes (n=5)

|             | <b>Marker Gene</b> | <b>Diff day 0</b> | <b>Diff day 6</b> | <b>Diff day 14</b> |
|-------------|--------------------|-------------------|-------------------|--------------------|
| Osteoblasts | <i>RUNX2</i>       | 1.1±0.03          | 1.6±0.09          | 3.4±0.08           |
|             | <i>OCN</i>         | 1.1±0.12          | 1.0±0.15          | 2.9±0.38           |
|             | <i>OSX</i>         | 1.0±0.01          | 1.3±0.07          | 2.2±0.08           |
| Adipocytes  | <i>CEBPA</i>       | 0.9±0.1           | 3.1±0.03          | 3.2±0.2            |
|             | <i>PPARG</i>       | 1.1±0.07          | 2.8±0.15          | 3.5±0.05           |
|             | <i>ADIPOQ</i>      | 1.0±0.2           | 1.3±0.07          | 5.2±0.2            |

Table S4. Related to Figure 3. Prioritization of the variants at the 3q21.1 locus using PMCA, Basset, and deltaSVM. Motif conservation and accessibility predictions were used. deltaSVM permutations are computed by shuffling nucleotides in the 21bp window centered on the SNP.

| snp               | r2 with rs2124500 | PMCA conservation score     |                   | estimated p-value | Basset accessibility score (trained on ATAC-seq data in AMSC (day 24)) |                                    | deltaSVM                           |                | deltaSVM  |  | permutationmax | permutations |
|-------------------|-------------------|-----------------------------|-------------------|-------------------|------------------------------------------------------------------------|------------------------------------|------------------------------------|----------------|-----------|--|----------------|--------------|
|                   |                   | number of jointly conserved | 0                 |                   | 1                                                                      | p(accessible   haplotype 1 allele) | p(accessible   haplotype 2 allele) | largest effect | mean      |  |                |              |
| rs6794202         | 0.98              | 67                          | 0.0536            | 0.22201           | 0.2181                                                                 | 0.00391                            | -12.8069                           | 874            | 122       |  |                |              |
| rs9883204         | 0.97              | 2                           | 0.0013            | 0.2132            | 0.21558                                                                | -0.00238                           | -14.3762                           | 741            | 334       |  |                |              |
| rs2124500         | 1                 | 40                          | 0.0002            | 0.2131            | 0.21543                                                                | 0.00233                            | -3.04982                           | 1205           | 1007      |  |                |              |
| rs11720108        | 0.84              | 10                          | 0.001             | 0.18567           | 0.19503                                                                | -0.00936                           | -14.7495                           | 743            | 642       |  |                |              |
| rs11719201        | 0.84              | 24                          | 0.0016            | 0.21545           | 0.2121                                                                 | 0.00334                            | 7.16918                            | 1667           | 1032      |  |                |              |
| rs35841686        | 0.96              | 12                          | 0.0002            | 0.22071           | 0.22016                                                                | -0.00056                           | -3.67856                           | 1156           | 1065      |  |                |              |
| rs11717195        | 0.87              | 44                          | <0.0001           | 0.20349           | 0.19531                                                                | 0.00818                            | 10.5904                            | 1780           | 287       |  |                |              |
| rs7614016         | 0.86              | 52                          | <0.0001           | 0.21623           | 0.22565                                                                | -0.00942                           | -10.507                            | 875            | 655       |  |                |              |
| rs34970607        | 0.96              | 54                          | <0.0001           | 0.20129           | 0.21054                                                                | -0.00925                           | 21.3527                            | 2019           | 53        |  |                |              |
| rs7613951         | 0.86              | 67                          | <0.0001           | 0.19648           | 0.18315                                                                | 0.01333                            | 14.5136                            | 1913           | 252       |  |                |              |
| rs2877716         | 0.98              | 72                          | <0.0001           | 0.217             | 0.22147                                                                | 0.00447                            | -8.75267                           | 965            | 537       |  |                |              |
| rs6798189         | 0.98              | 189                         | <0.0001           | 0.19747           | 0.20886                                                                | -0.01139                           | 13.7421                            | 1895           | 281       |  |                |              |
| <b>rs56371916</b> | <b>0.98</b>       | <b>189</b>                  | <b>&lt;0.0001</b> | <b>0.19873</b>    | <b>0.16755</b>                                                         | <b>0.03118</b>                     | <b>17.9303</b>                     | <b>1966</b>    | <b>70</b> |  |                |              |

Table S5. Related to Figure S3D. Quantification of bands from competition EMSA using ImageJ software. NE, nuclear extract.

| Well Nr. | NE       | Competitor amount | Probe         | Band quantification |
|----------|----------|-------------------|---------------|---------------------|
| 1        | -        | -                 | rs56371916 -C |                     |
| 2        | -        | -                 | rs56371916 -T |                     |
| 3        |          | -                 | rs56371916 -C | 5199.865            |
| 4        |          | -                 | rs56371916 -T | 3840.087            |
| 5        |          | 11x               | rs56371916 -C | 5057.066            |
| 6        |          | 11x               | rs56371916 -T | 3722.966            |
| 7        | AMSC d0  | 33x               | rs56371916 -C | 4553.007            |
| 8        |          | 33x               | rs56371916 -T | 5902.572            |
| 9        |          | 100x              | rs56371916 -C | 4632.179            |
| 10       |          | 100x              | rs56371916 -T | 5491.271            |
| 11       |          | 200x              | rs56371916 -C | 2318.974            |
| 12       |          | 200x              | rs56371916 -T | 3081.894            |
| 13       |          | -                 | rs56371916 -C | 7595.522            |
| 14       |          | -                 | rs56371916 -T | 10941.685           |
| 15       |          | 11x               | rs56371916 -C | 4524.936            |
| 16       |          | 11x               | rs56371916 -T | 10942.626           |
| 17       | AMSC d10 | 33x               | rs56371916 -C | 4423.501            |
| 18       |          | 33x               | rs56371916 -T | 6478.513            |
| 19       |          | 100x              | rs56371916 -C | 0                   |
| 20       |          | 100x              | rs56371916 -T | 3936.572            |
| 21       |          | 200x              | rs56371916 -C | 0                   |
| 22       |          | 200x              | rs56371916 -T | 2734.238            |



Table S6. Related to Figure 5. Enriched gene ontology (GO) terms for *ADCY5* co-expressed mRNAs in human adipose stromal cells (AMSC) isolated from 12 healthy non-obese patients (Pearson's  $r > 0.7$ ).

| GO term (Pathways, humanmine.org accessed May 29 2018) | Enrichment p-value* | # matches | % of co-expressed genes |
|--------------------------------------------------------|---------------------|-----------|-------------------------|
| <i>Co-expressed (203 recognized genes)</i>             |                     |           |                         |
| Fatty acid metabolism                                  | 0.001               | 7         | 3.4                     |
| Valine, leucine and isoleucine degradation             | 0.027               | 6         | 3.0                     |
| Beta oxidation of octanoyl-CoA to hexanoyl-CoA         | 0.035               | 3         | 1.5                     |

\* P-values are Holm-Bonferroni corrected. Correlation coefficients  $> 0.576$  were statistically significant (p-value  $< 0.05$ ) (full list of genes shown in Supplemental Table 12).

Table S7. Related to Figure 5. Selected mRNAs correlated with ADCY5 mRNA in human adipose stromal cells (AMSC) and mature adipocytes isolated from 12 healthy non-obese patients.

| Gene                                                          | Probe ID     | Gene ID | Definition                                                                               | AMSC        |         | Mature adipocytes |         |
|---------------------------------------------------------------|--------------|---------|------------------------------------------------------------------------------------------|-------------|---------|-------------------|---------|
|                                                               |              |         |                                                                                          | Pearson's r | P-value | Pearson's r       | P-value |
| <i>Co-expressed with ADCY5 (Fatty acid metabolism)</i>        |              |         |                                                                                          |             |         |                   |         |
| ACADM                                                         | ILMN_2053679 | 34      | acyl-Coenzyme A dehydrogenase, C-4 to C-12 straight chain (ACADM), nuclear gene          | 0.764       | 0.003   | -0.092            | 0.776   |
| ACAT1                                                         | ILMN_1800008 | 38      | acetyl-Coenzyme A acetyltransferase 1 (acetoacetyl Coenzyme A thiolase) (ACAT1), r       | 0.756       | 0.004   | 0.380             | 0.225   |
| ADH1A                                                         | ILMN_1764309 | 124     | alcohol dehydrogenase 1A (class I), alpha polypeptide (ADH1A)                            | 0.862       | 0.000   | 0.096             | 0.769   |
| ADH1B                                                         | ILMN_1811598 | 125     | alcohol dehydrogenase 1B (class I), beta polypeptide (ADH1B)                             | 0.718       | 0.009   | 0.208             | 0.518   |
| CPT2                                                          | ILMN_1678579 | 1376    | carnitine palmitoyltransferase II (class I), nuclear gene encoding mitochondrial protein | 0.761       | 0.005   | 0.061             | 0.843   |
| HADH                                                          | ILMN_1719906 | 3033    | hydroxyacyl-Coenzyme A dehydrogenase (HADH), nuclear gene encoding mitochondr            | 0.796       | 0.002   | 0.137             | 0.672   |
| HADHB                                                         | ILMN_2197846 | 3032    | hydroxyacyl-Coenzyme A dehydrogenase/3-ketoacyl-Coenzyme A thiolase/enoyl-Coer           | 0.707       | 0.010   | -0.211            | 0.515   |
| <i>Fatty acid metabolism (marker genes)</i>                   |              |         |                                                                                          |             |         |                   |         |
| ACACA                                                         | ILMN_1772123 | 31      | acetyl-Coenzyme A carboxylase alpha (ACACA), transcript variant 2                        | 0.426       | 0.163   | 0.044             | 0.891   |
| ACACB                                                         | ILMN_1763852 | 32      | acetyl-Coenzyme A carboxylase beta (ACACB)                                               | 0.475       | 0.116   | 0.597             | 0.041   |
| ADFP/PLIN2                                                    | ILMN_1801077 | 123     | adipose differentiation-related protein (ADFP)                                           | 0.207       | 0.543   | 0.111             | 0.187   |
| ADIPOQ                                                        | ILMN_1775045 | 9370    | adiponectin, C1Q and collagen domain containing (ADIPOQ)                                 | 0.677       | 0.017   | 0.497             | 0.102   |
| CD36                                                          | ILMN_1665132 | 948     | CD36 molecule (thrombospondin receptor) (CD36), transcript variant 2                     | 0.444       | 0.150   | 0.009             | 0.572   |
| CEBPA                                                         | ILMN_1715715 | 1050    | CCAAT/enhancer binding protein (C/EBP), alpha (CEBPA)                                    | 0.571       | 0.051   | 0.012             | 0.973   |
| LIPE                                                          | ILMN_1670693 | 3991    | lipase, hormone-sensitive (LIPE)                                                         | 0.556       | 0.062   | 0.234             | 0.463   |
| MGLL                                                          | ILMN_1707310 | 11343   | monoglyceride lipase (MGLL), transcript variant 2                                        | 0.275       | 0.404   | 0.339             | 0.281   |
| PLIN                                                          | ILMN_1665562 | 5346    | perilipin (PLIN)                                                                         | 0.607       | 0.037   | 0.557             | 0.062   |
| PNPLA2                                                        | ILMN_1787923 | 57104   | patatin-like phospholipase domain containing 2 (PNPLA2)                                  | 0.321       | 0.306   | 0.421             | 0.171   |
| PPARG                                                         | ILMN_1800225 | 5468    | peroxisome proliferator-activated receptor gamma (PPARG), transcript variant 2           | 0.694       | 0.012   | 0.049             | 0.880   |
| SLC27A1                                                       | ILMN_1787718 | 376497  | solute carrier family 27 (fatty acid transporter), member 1 (SLC27A1)                    | 0.143       | 0.675   | 0.513             | 0.089   |
| <i>Osteoblast differentiation and function (marker genes)</i> |              |         |                                                                                          |             |         |                   |         |
| KLF15                                                         | ILMN_1683133 | 28999   | Kruppel-like factor 15 (KLF15)                                                           | 0.761       | 0.004   | 0.179             | 0.581   |
| LIF                                                           | ILMN_1738725 | 3976    | leukemia inhibitory factor (cholinergic differentiation factor) (LIF)                    | -0.854      | 0.0003  | -0.235            | 0.452   |
| OCX/SP7                                                       | ILMN_1689461 | 121340  | Sp7 transcription factor (SP7)                                                           | -0.089      | 0.811   | 0.229             | 0.482   |
| OSN/BGLAP                                                     | ILMN_1755818 | 632     | bone gamma-carboxylglutamate (gla) protein (osteocalcin) (BGLAP)                         | 0.070       | 0.829   | -0.156            | 0.628   |
| RUNX2                                                         | ILMN_1716651 | 860     | runt-related transcription factor 2 (RUNX2), transcript variant 2                        | -0.487      | 0.117   | 0.635             | 0.027   |
| ZNF26                                                         | ILMN_1691798 | 7574    | zinc finger protein 26 (ZNF26)                                                           | -0.713      | 0.009   | -0.062            | 0.837   |
| ZNF74                                                         | ILMN_2383871 | 7625    | zinc finger protein 74 (ZNF74)                                                           | 0.640       | 0.026   | -0.407            | 0.189   |
| ZNF133                                                        | ILMN_2174081 | 7692    | zinc finger protein 133 (ZNF133)                                                         | 0.750       | 0.005   | 0.336             | 0.289   |
| ZNF319                                                        | ILMN_1711361 | 57567   | zinc finger protein 319 (ZNF319)                                                         | 0.799       | 0.002   | 0.149             | 0.643   |
| ZNF485                                                        | ILMN_1664034 | 220992  | zinc finger protein 485 (ZNF485)                                                         | 0.710       | 0.010   | 0.013             | 0.981   |

Correlation coefficients > 0.576 were statistically significant (p-value < 0.05). Correlations were calculated based on log2-transformed mRNA expression values.

Table S8. Related to Figure 5. Fold change and significance (p-value) of expression changes in primary human osteoblasts and adipocytes (haplotype 1 and haplotype 2). p-values were calculated by Mann Whitney U test.

|             | <b>Gene</b>  | <b>Homozygous/ Heterozygous<br/>Fold change (<math>\pm</math>SE)</b> | <b>p-value</b> |
|-------------|--------------|----------------------------------------------------------------------|----------------|
| Osteoblasts | <i>RUNX2</i> | 1.9 $\pm$ 0.42                                                       | 0.06           |
|             | <i>OCN</i>   | 1.4 $\pm$ 0.32                                                       | 0.04           |
|             | <i>OSX</i>   | 1.2 $\pm$ 0.27                                                       | 0.001          |
|             | <i>ACCB</i>  | 1.1 $\pm$ 0.13                                                       | 0.04           |
|             | <i>ACAT1</i> | 1.5 $\pm$ 0.31                                                       | 0.05           |
|             | <i>CPT1</i>  | 1.7 $\pm$ 0.22                                                       | 0.001          |
| Adipocytes  | <i>ATGL</i>  | 1.3 $\pm$ 0.35                                                       | 0.02           |
|             | <i>LIPE</i>  | 2.1 $\pm$ 0.56                                                       | 0.01           |
|             | <i>PLIN2</i> | 1.4 $\pm$ 0.25                                                       | 0.05           |

Table S9. Related to Figure 5. CRISPR based single-nucleotide editing reverses osteoblast differentiation and adipocyte lipid metabolism marker genes, confirming pleiotropy.

**Relative mRNA levels in osteoblasts (ratio TT/CC)**

| Gene         | Fold change | p-value | Fold change ( $\pm$ ) | p-value |
|--------------|-------------|---------|-----------------------|---------|
| <i>ADCY5</i> | 1.6+0.4     | 0.0286  | 1.1+0.2               | n.s.    |

**Relative AP activity levels in osteoblasts (ratio TT/CC)**

|  |  | Diff day 14 |         |
|--|--|-------------|---------|
|  |  | Fold change | p-value |
|  |  | 1.6+0.2     | 0.01    |

**Relative mRNA levels in adipocytes (ratio CC/TT)**

| Gene         | Fold change | p-value | Fold change | p-value |
|--------------|-------------|---------|-------------|---------|
| <i>ADCY5</i> | 0.7+0.3     | 0.0286  | 1.03+0.3    | n.s.    |

**Relative mRNA levels in adipocytes (ratio TT/CC)**

| Gene         | Diff day 0  |         | Diff day 14 |         |
|--------------|-------------|---------|-------------|---------|
|              | Fold change | p-value | Fold change | p-value |
| <i>ATGL</i>  | 1.3+0.4     | 0.02    | 1.5+0.9     | 0.07    |
| <i>HSL</i>   | 1.8+0.63    | 0.09    | 1.8+0.4     | 0.03    |
| <i>PLIN2</i> | 1.9+0.42    | 0.05    | 1.9+1.2     | 0.05    |

**Figure S1. Manhattan plot of genome-wide association results for bone density and glyceimic traits using CP-ASSOC (Related to Figure 1).**

**Panel A.** Bivariate genetic associations for two bone traits LSBMD and FNBMD and four glyceimic traits (HOMA-IR, HOMA-B, fasting glucose levels, and fasting insulin levels). Genetic loci passing bivariate criteria are highlighted in red.

**Panel B.** Stratified LD score regression analysis (Finucane et al., 2015) across the entire bivariate GWAS for all FNBMD, LSBMD, FG, FI, HOMAIR and HOMAB pairs using active histone modification genome-wide ChIP-seq data from diverse cell types and tissues. Cutoff for Bonferroni significance ( $-\log_{10}(P) = 3.25$ ) is indicated by black dotted lines.

**Panel C.** Stratified LD score regression analysis (Finucane et al., 2015) for mesenchymal versus non-mesenchymal cell type groups for diverse histone marks.

**Panel D.** Annotation panel and color key for the 25 chromatin state model (Roadmap Epigenomics Consortium et al., 2015). Rows represent states and columns are emission parameters (left table) and enrichments of relevant genomic annotations (right panel).

**Panel E.** Allelic imbalance analysis of the *3p21.1* risk locus for chromatin accessibility by ATAC-seq in heterozygous AMSCs from two individuals comparing haplotype 1 (blue) and haplotype 2 (pink). Each panel depicts ATAC-seq read counts separated by strand above/below the midpoint.

**Panel F.** Allelic imbalance analysis of the *3p21.1* risk locus for chromatin accessibility by DHS-seq in heterozygous skeletal muscle-derived MSCs (Maurano et al., 2015) comparing haplotype 1 (blue) and haplotype 2 (pink). Each panel depicts DHS-seq read counts separated by strand above/below the midpoint.

**Figure S2. AMSC-derived adipocytes and osteoblast differentiation model system (Related to Figure 2).**

**Panel A.** Lineage relationships of MSCs and MSC-derived lineages. Epigenome identity (EID) numbers from the Roadmap Epigenomics (Roadmap Epigenomics Consortium *et al.*, 2015) are indicated.

**Panel B.** Microscopic visualization of morphological and cellular changes of AMSCs during adipocyte and osteoblast from bright field microscopy, Oil-Red-O lipid staining (adipocytes) and Alkaline Phosphatase and Alizarin Red (osteoblasts). Representative images are shown from three replicates.

**Figure S3. rs56371916 – SREBP1 – ADCY5 regulatory circuitry and its cellular mechanisms in adipocytes and osteoblasts (Related to Figure 3 to 5).**

**Panel A.** Correlation of predicted SNP accessibility difference from the CNN Basset and chromatin accessibility for variants at the *3p21.1* locus. rs56371916:  $r = 0.957$ ,  $P = 0.04$ .

**Panel B.** Distribution of CNN predicted SNP accessibility for 29,472 trait-associated SNPs in the GWAS catalog. Empirical  $P$  (rs56371916) = 0.0061.

**Panel C.** rs56371916 allele-specific luciferase assays for 1kb centered on rs56371916 in adipocytes and osteoblasts. Mean + SD  $**P < 0.01$ .

**Panel D.** Competition EMSA assays using adipocyte nuclear extract and 11-, 33-, 100-, and 200-molar excess of unlabeled probes. Representative blot from three replicates is shown.

**Panel E.** Correlation of *ADCY5* mRNA with *SREBP1* mRNA in human subcutaneous adipose tissue from 30 (Cohort 2) and subcutaneous AMSCs from 24 individuals (Cohort 3), measured by Illumina microarrays. Pearson's  $r$  (whole tissue) = 0.63,  $P = 7 \times 10^{-6}$ ,  $r$  (AMSC) = - 0.426,  $P = 0.038$ .

**Panel F.** Correlation of *ADCY5* mRNA with *SREBP2* mRNA in human subcutaneous adipose tissue from 312\_270 (Cohort 2) and subcutaneous AMSCs from 24 lean individuals (Cohort 3), measured by Illumina microarrays.

**Panel G.** Quantification of gene expression for *ADCY5*, *SREBP1*, and *SREBP2* in differentiating human adipocytes (yellow background) and differentiating mouse osteoblasts (blue background) from the FANTOM5 database.

**Panel H.** Schematic regulatory model of the *3p21.1* risk locus.

**Panel I.** Catecholamine-stimulated glycerol release in differentiated adipocytes from 23 homozygotes and 18 heterozygotes for haplotype 1 (Cohort 1). Mean + SD  $**P < 0.01$ .

**Panel J.** Oxidation of [14C]-palmitate to  $^{14}\text{CO}_2$  at different stages of osteoblast differentiation (day 0, day 3, and day 7). Mean + SD  $**P < 0.01$ ;  $***P < 0.001$ ;  $n = 4$  (haplotypes 1/2) and  $n = 4$  (haplotypes 1/1), Cohort 4.

**Panel K.** Quantification of gene expression of marker genes involved in fatty acid transport and lipid oxidation in murine bone marrow stromal cells (BMSCs) differentiated to osteoblasts (day 0, 1, 2, 3, 7).

**Panel L.** Catecholamine-stimulated glycerol release upon doxycycline-induced overexpression of *ADCY5* in adipocytes from qPCR. Mean + SD  $**P < 0.01$ ;  $n = 4$  (haplotypes 1/2) and  $n = 4$  (haplotypes 1/1), Cohort 4.

**Panel M.** Quantification of *RUNX2* gene expression from qPCR upon siRNA knock-down of *ADCY5* (56% knock-down efficiency). Mean + SD  $**P < 0.01$ ;  $n = 18$  (haplotypes 1/2) and  $n = 23$  (haplotypes 1/1), Cohort 1.
